# Supplementary material for: Bone marrow drives central nervous system regeneration after radiation injury
Source: JCI journal article supplement (doi:10.1172/jci90647), 2017-12-03

Supplementary figure 1

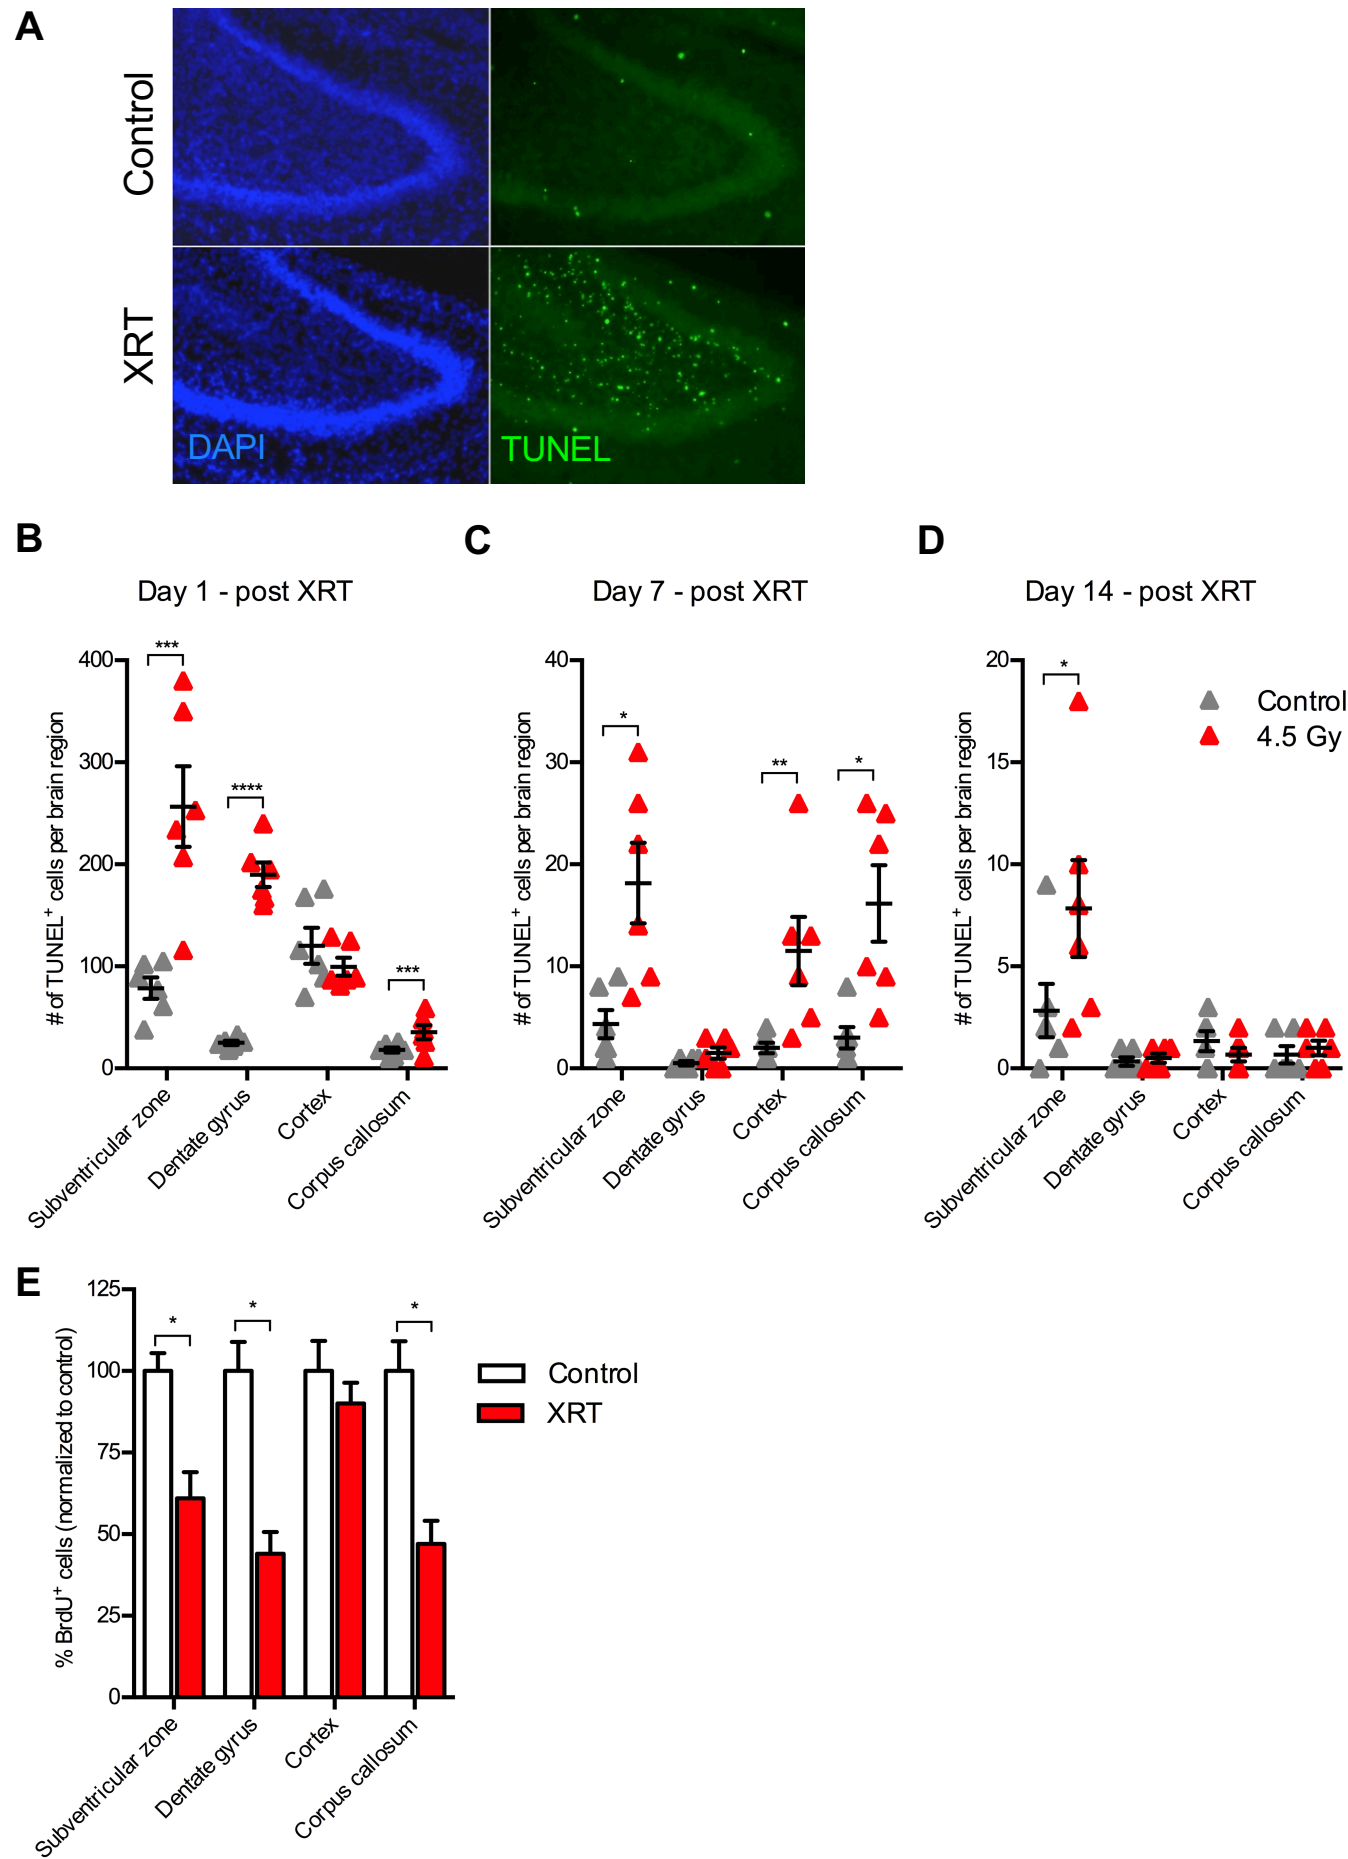

Supplementary figure 2

A

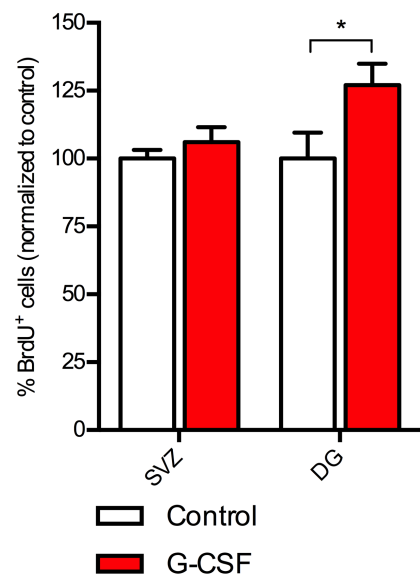

B

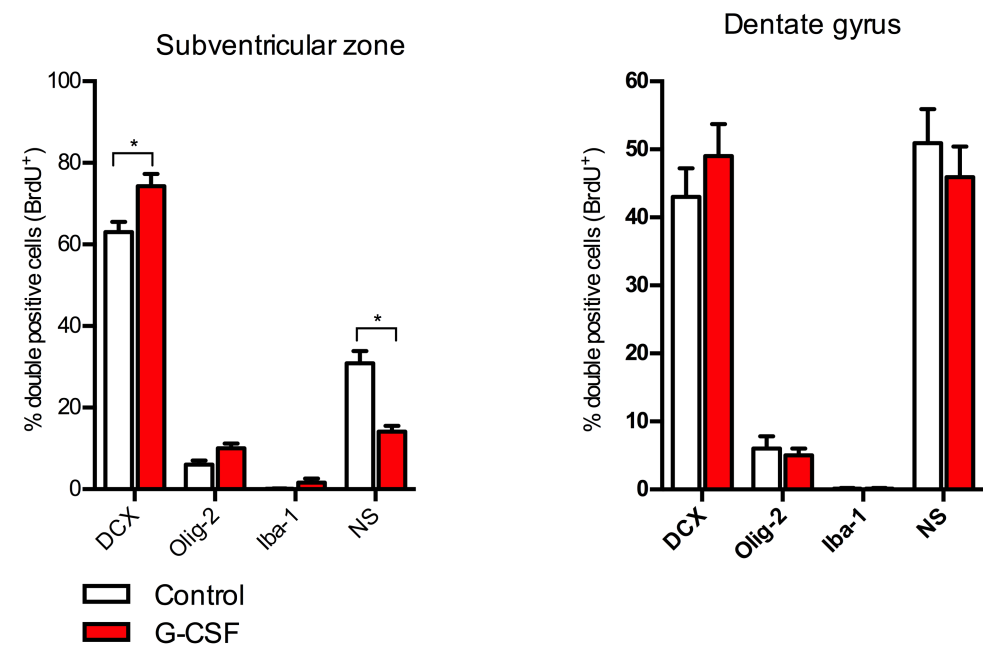

Supplementary figure 3

A

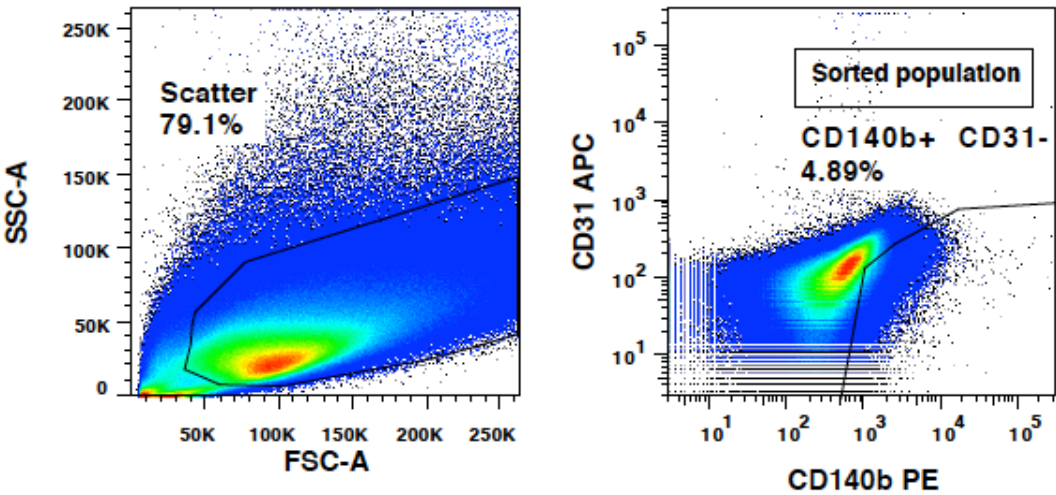

B

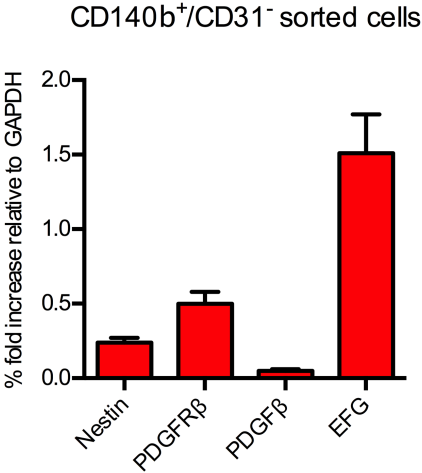

Supplementary figure 4

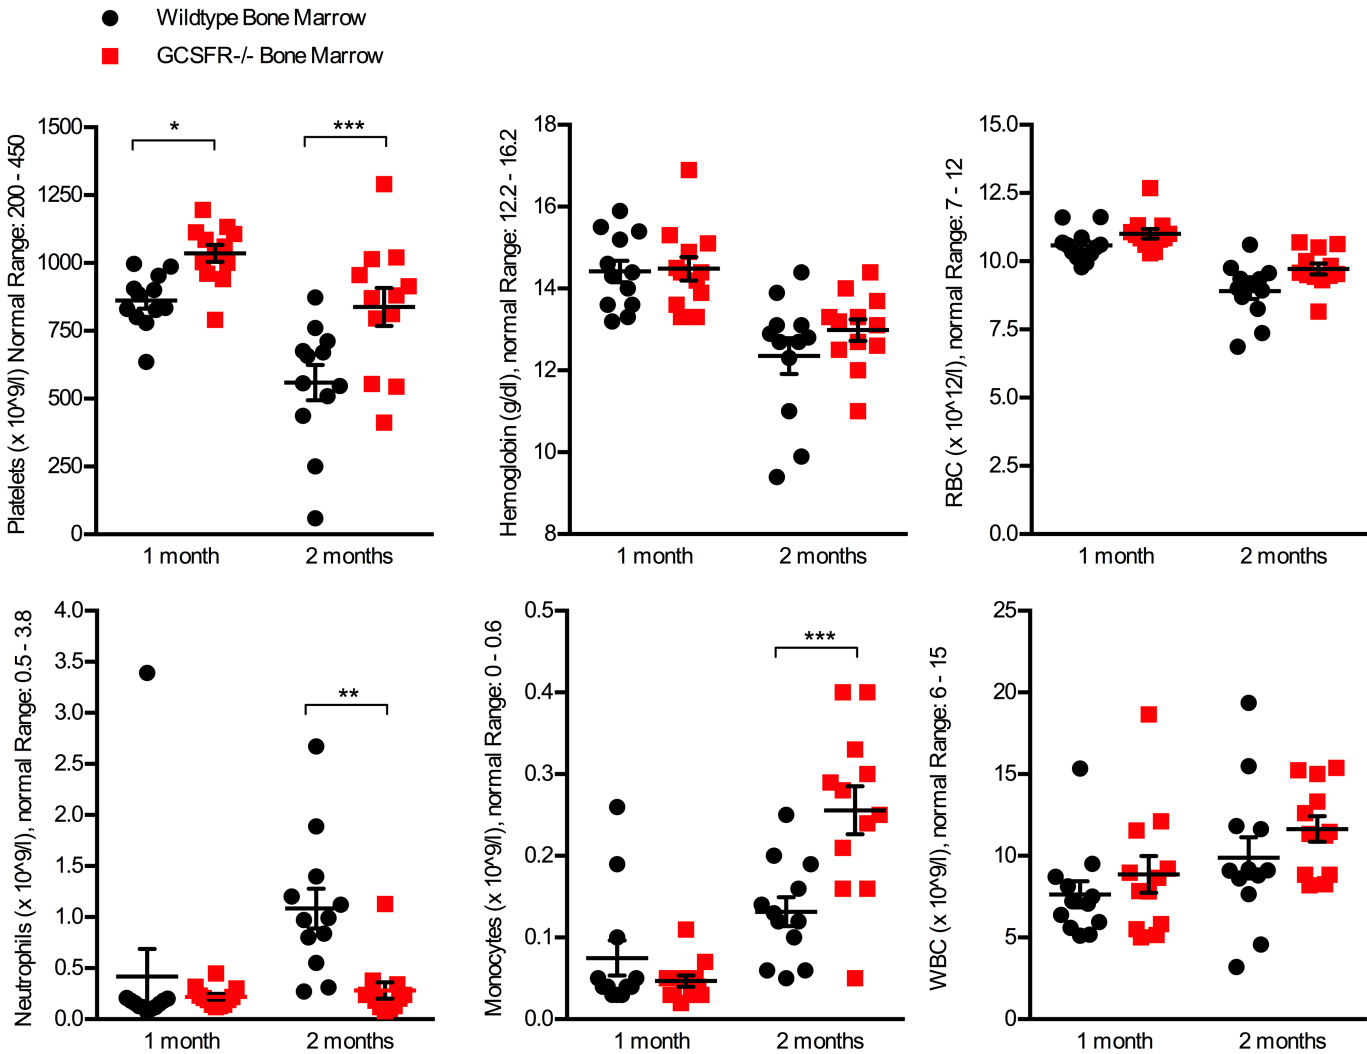

Supplementary figure 5

A

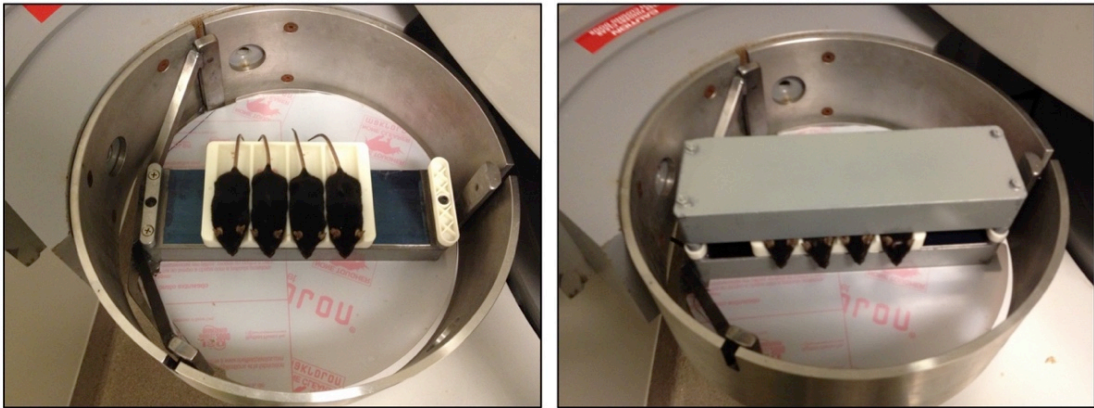

B

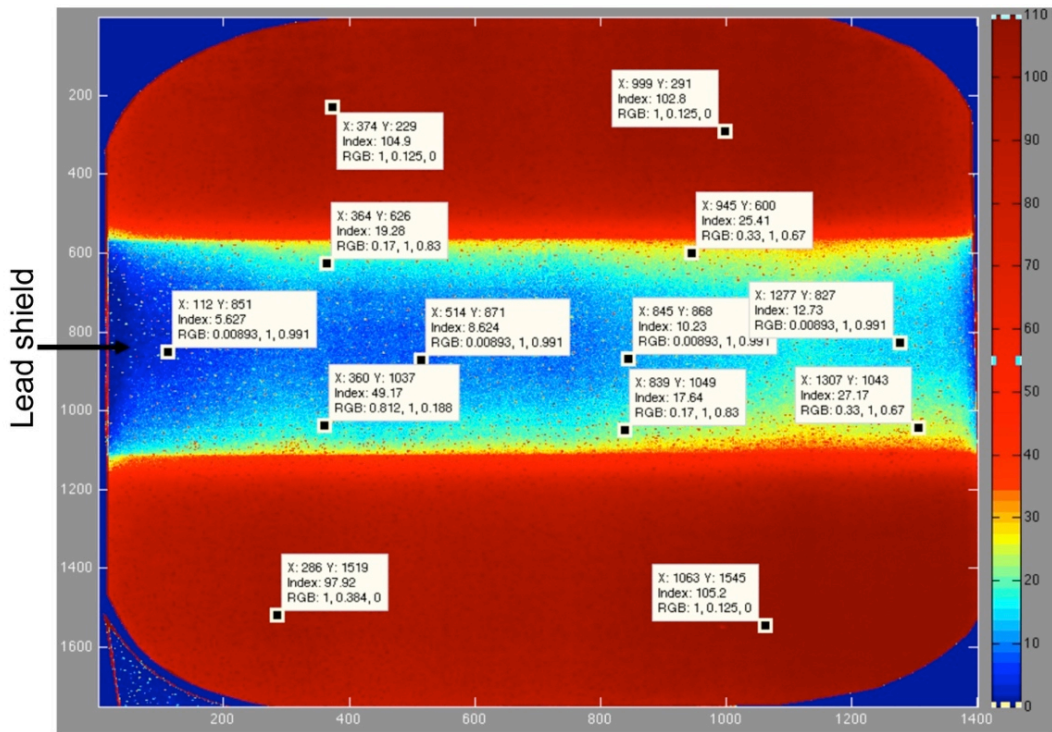

C

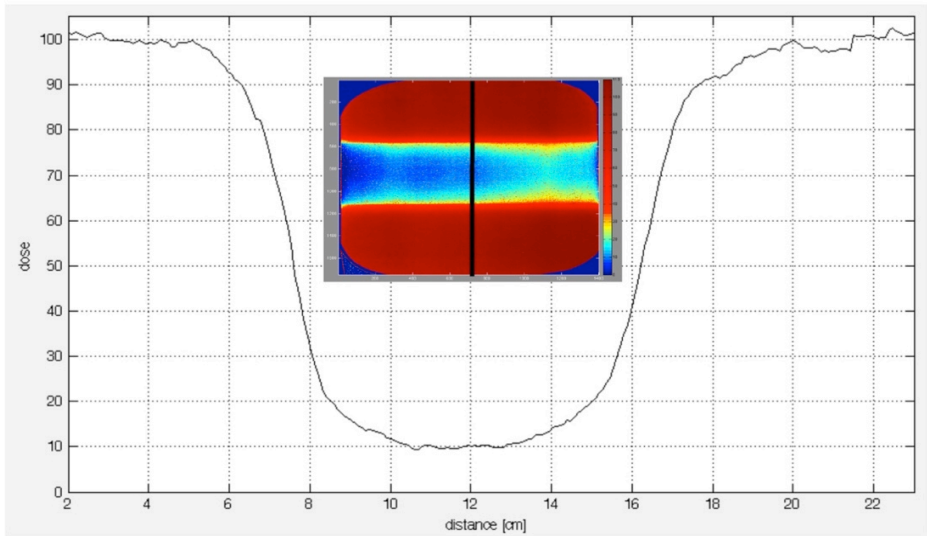

Supplementary figure 6

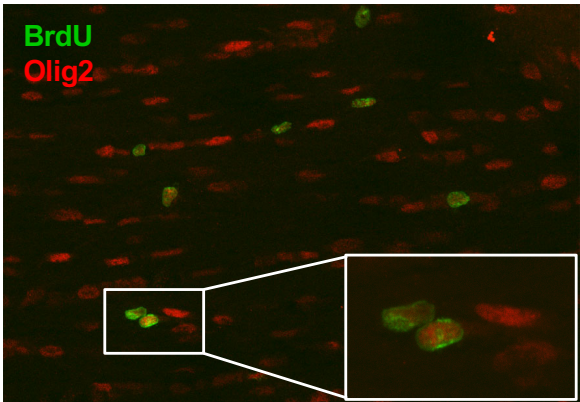

Supplementary figure 7

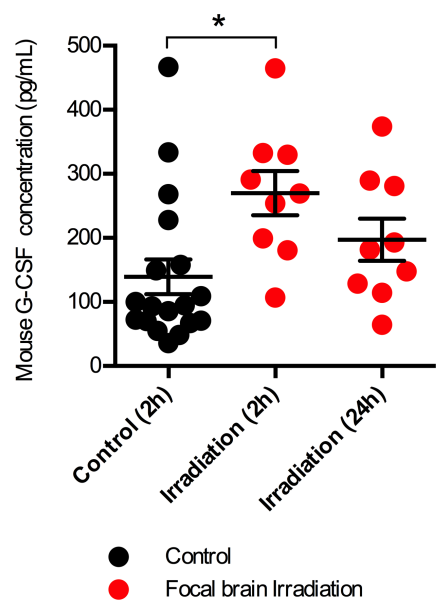

Supplementary figure 8

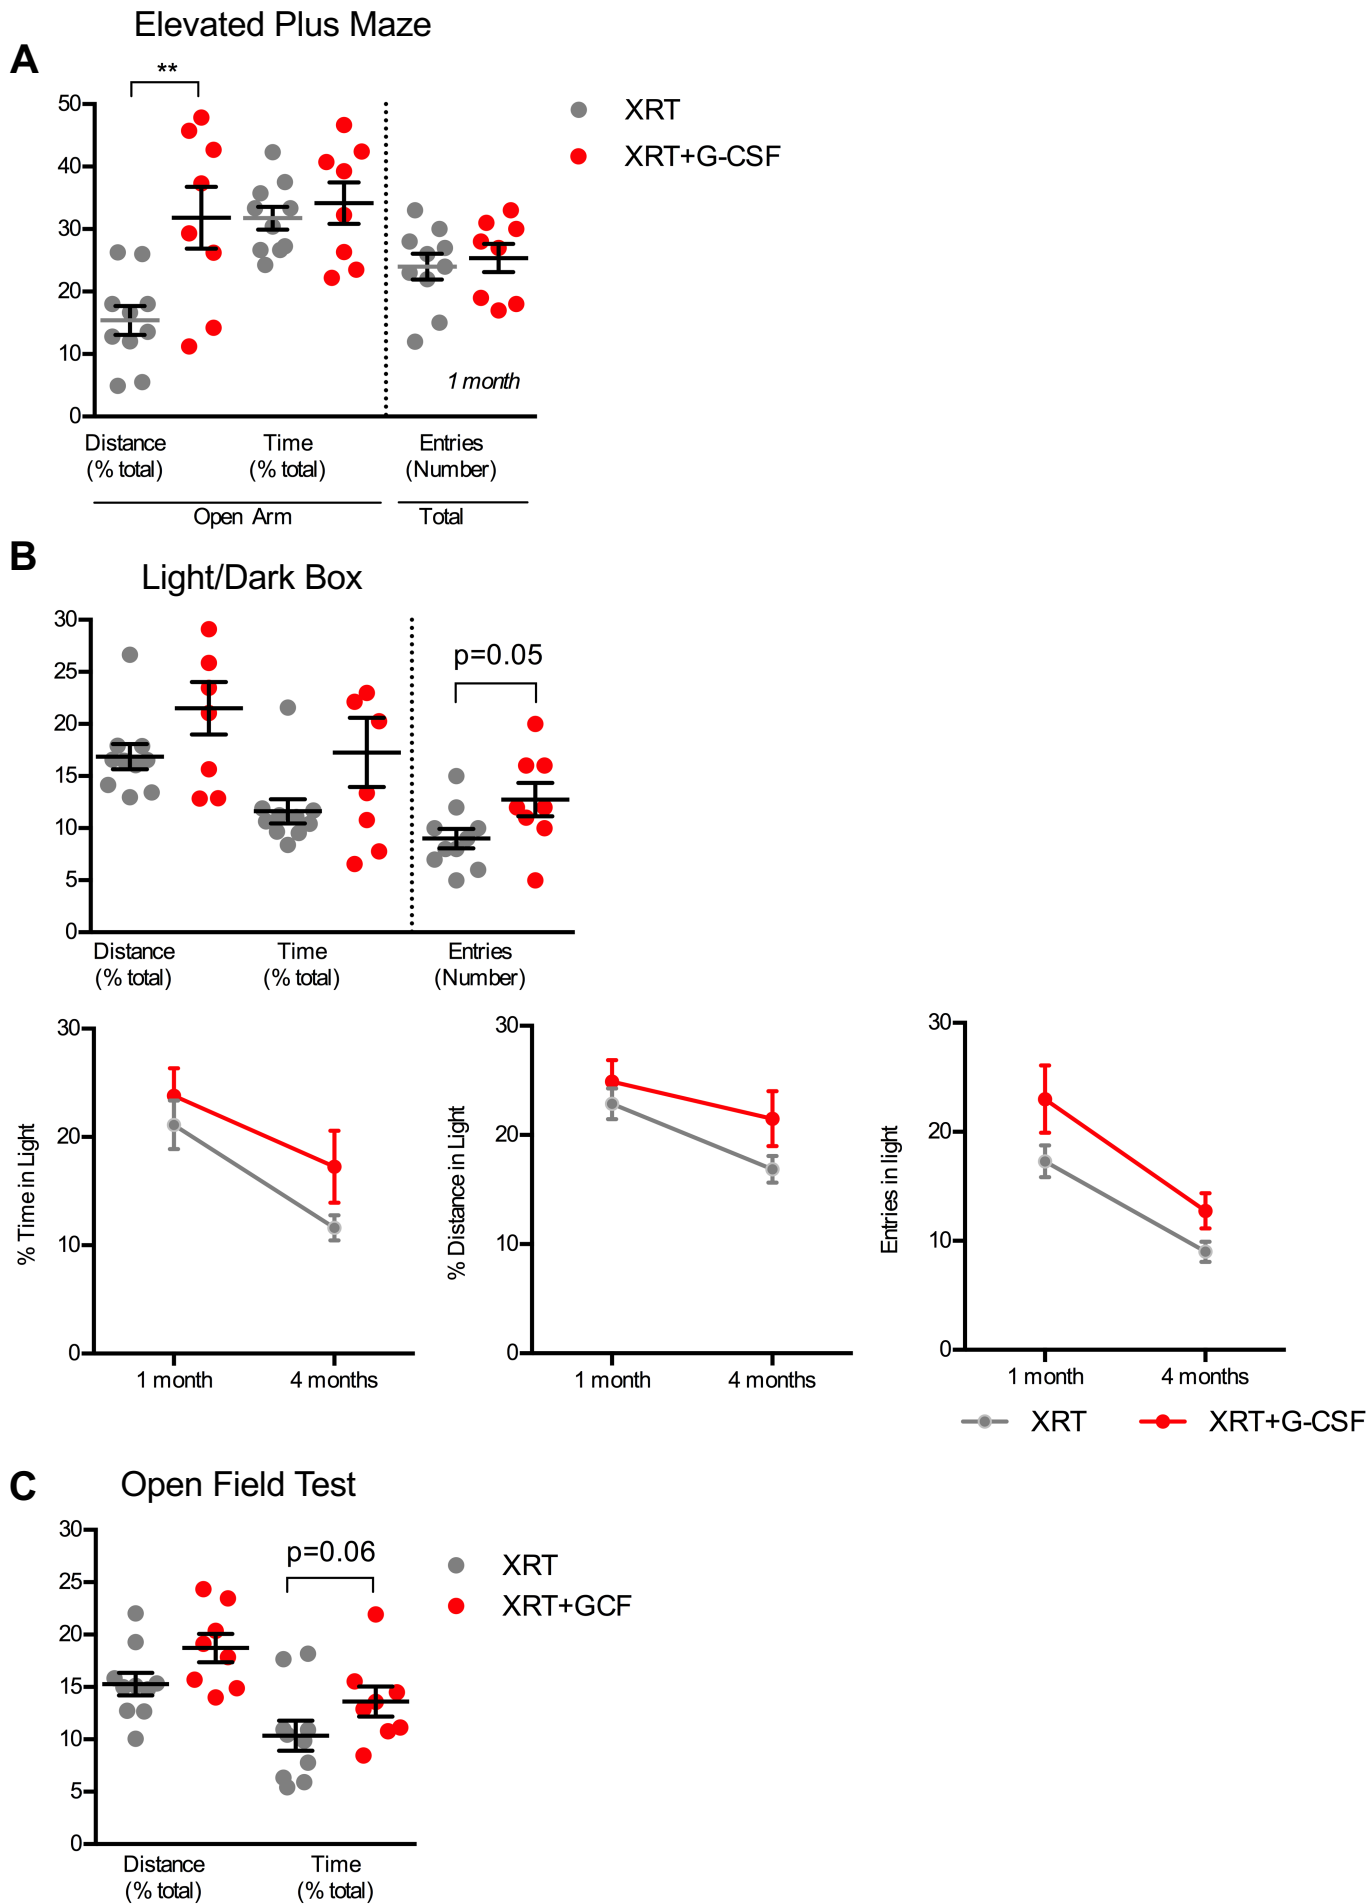



Supplementary figure 9

A

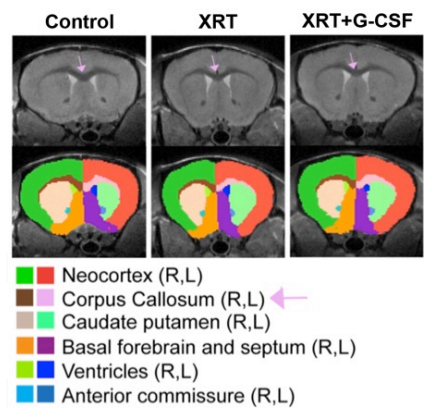

B

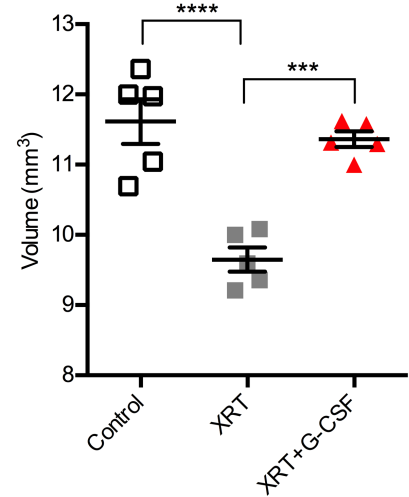

Supplement: sd1 [file 1]
